# Supplementary material for: Perinatal Exposure to Delta-9-tetrahydrocannabinol (THC) Alters Goal-Directed Behavior and Dopamine Functioning in Wistar Rats
Source: Research Square preprint supplement (doi:10.21203/rs.3.rs-7736721/v1), 2025-11-06
Supplement: Supplementary file 1 [file b1d2d02e44b499f896d77942.docx]

*Supplemental Table 1.* Analysis Details for Each Dependent Measure Examined

**Measure Dependent Variable Analysis**

Neurotoxicity Measures Maternal Weight Gain (g) Independent samples *t*-test

Gestational Weight Gain (g) Independent samples *t*-test

Litter Size Independent samples *t*-test

Percent Live Births Independent samples *t*-test

Percent Male Independent samples *t*-test

Implantation Sites Independent samples *t*-test

Dam Brain: Body Weight (g) Independent samples *t*-test

Dam Liver: Body Weight (g) Independent samples *t*-test

Pup Brain: Body Weight (g) 2 (Exposure) x 2 (*Sex*) ANOVA

Pup Liver: Body Weight (g) 2 (Exposure) x 2 (*Sex*) ANOVA

Post-natal weight gain (g) 2 (Exposure) x 2 (*Sex*) x 4 (*Day*) ANOVA

Maternal Behavior Pup retrieval (sec) 2 (Exposure) x 4 (*Day*) ANOVA

DRH Lever Presses 2 (Exposure) x 2 (*Sex*) x 3 (*Phase*) ANOVA

Reinforcers 2 (Exposure) x 2 (*Sex*) x 3 (*Phase*) ANOVA

DRL 15

Molar Measures Rein:Nonreinf Responses 2 (Exposure) x 2 (*Sex*) x 6 (*Block*) ANOVA

Reinforcers Earned 2 (Exposure) x 2 (*Sex*) x 6 (*Block*) ANOVA

Total Trials 2 (Exposure) x 2 (*Sex*) x 6 (*Block*) ANOVA

Peak Deviation Analysis Burst Ratio 2 (Exposure) x 2 (*Sex*) x 6 (*Block*) ANOVA

Peak Area 2 (Exposure) x 2 (*Sex*) x 6 (*Block*) ANOVA

Peak Location 2 (Exposure) x 2 (*Sex*) x 6 (*Block*) ANOVA

FPA mPFC Baseline Release 2 (Exposure) x 2 (*Sex*) ANOVA

Baseline Synaptic Half-life 2 (Exposure) x 2 (*Sex*) ANOVA

FPA NAc Baseline Release 2 (Exposure) x 2 (*Sex*) ANOVA

Baseline Synaptic Half-life 2 (Exposure) x 2 (*Sex*) ANOVA

Available Supply 2 (Exposure) x 2 (*Sex*) ANOVA

Autoreceptor Sensitivity 2 (Exposure) x 2 (*Sex*) x 7 (*Prepulse*) ANOVA

Release Post-cocaine 2 (Exposure) x 2 (*Sex*) x 7 *(Time)* ANOVA

Synaptic Half-life Post-cocaine 2 (Exposure) x 2 (*Sex*) x 7 *(Time)* ANOVA

Note. Italics denotes repeated-measures factor. g=grams, sec=seconds; DRH = Differential Reinforcement of High Rates; DRL = Differential Reinforcement of Low Rates; FPA = Fixed Potential Amperometry; Medial prefrontal cortex = mPFC; Nucleus accumbens = NAc

*Supplemental Table 2.* Neurotoxiology and Maternal Behavior Outcomes

**0 mg/kg THC (vehicle) 5.0 mg/kg THC**

**n = 7 litters n = 10 litters**

______________________________________________________________________________

Dams (PND 0- Parturition)

Gestational Weight Gain (g) 146.71 ± 10.48 141.80 ± 5.39

Litter Size 14.00 ± .69 13.60 ± .50

Percent Live Births 100.00 97.70 ± 1.17

Percent Male 48.43 ± 4.33 42.30 ± 4.58

Dams (Parturition – Weaning)

Lactational Weight Gain (g) 59.00 ± 5.99 41.70 ± 4.62C

Implanation Sites 15.43 ± .20 14.80 ± .53

Brain:Body Weight (g) .0062 ± .0001 .0065 ± .0001D

Liver: Body Weight (g) .0489 ± .0009 .0500 ± .0010

Pups (Body Weight: Birth – Weaning, g)

PND 0 6.15 ± .21 5.69 ± .18

PND 7 14.40 ± .53 13.85 ± .45

PND 14 30.42 ± .81 27.23 ± .68A

PND 21 50.90 ± 1.64 45.28 ± 1.37B

Pups (Organ Weights at Weaning; g)

Male Brain:Body Weight .0293 ± .0012 .0320 ± .0008

Female Brain:Body Weight .0301 ± .0013 .0327 ± .0009

Male Liver:Body Weight .0387 ± .0011 .0403 ± .0006

Female Liver:Body Weight .0423 ± .0011 .0409 ± .0006

Dam Pup Retrieval (sec)

PND 2 178.55 ± 42.60 233.31 ± 60.85

PND 4 148.58 ± 47.45 235.31 ± 55.39

PND 6 87.31 ± 32.04 229.42 ± 62. 84

PND 8 162.83 ± 45.44 179.96 ± 64. 20

______________________________________________________________________________*Note.* Values represent means ± standard error of the mean (SEM), THC = delta-9-tetrahydrocannabinol, PND = postnatal day, g=grams, sec = seconds, A*p*=.009, B*p*=.019, C*p*=.035, D*p*=.036, ηp²=.210

*
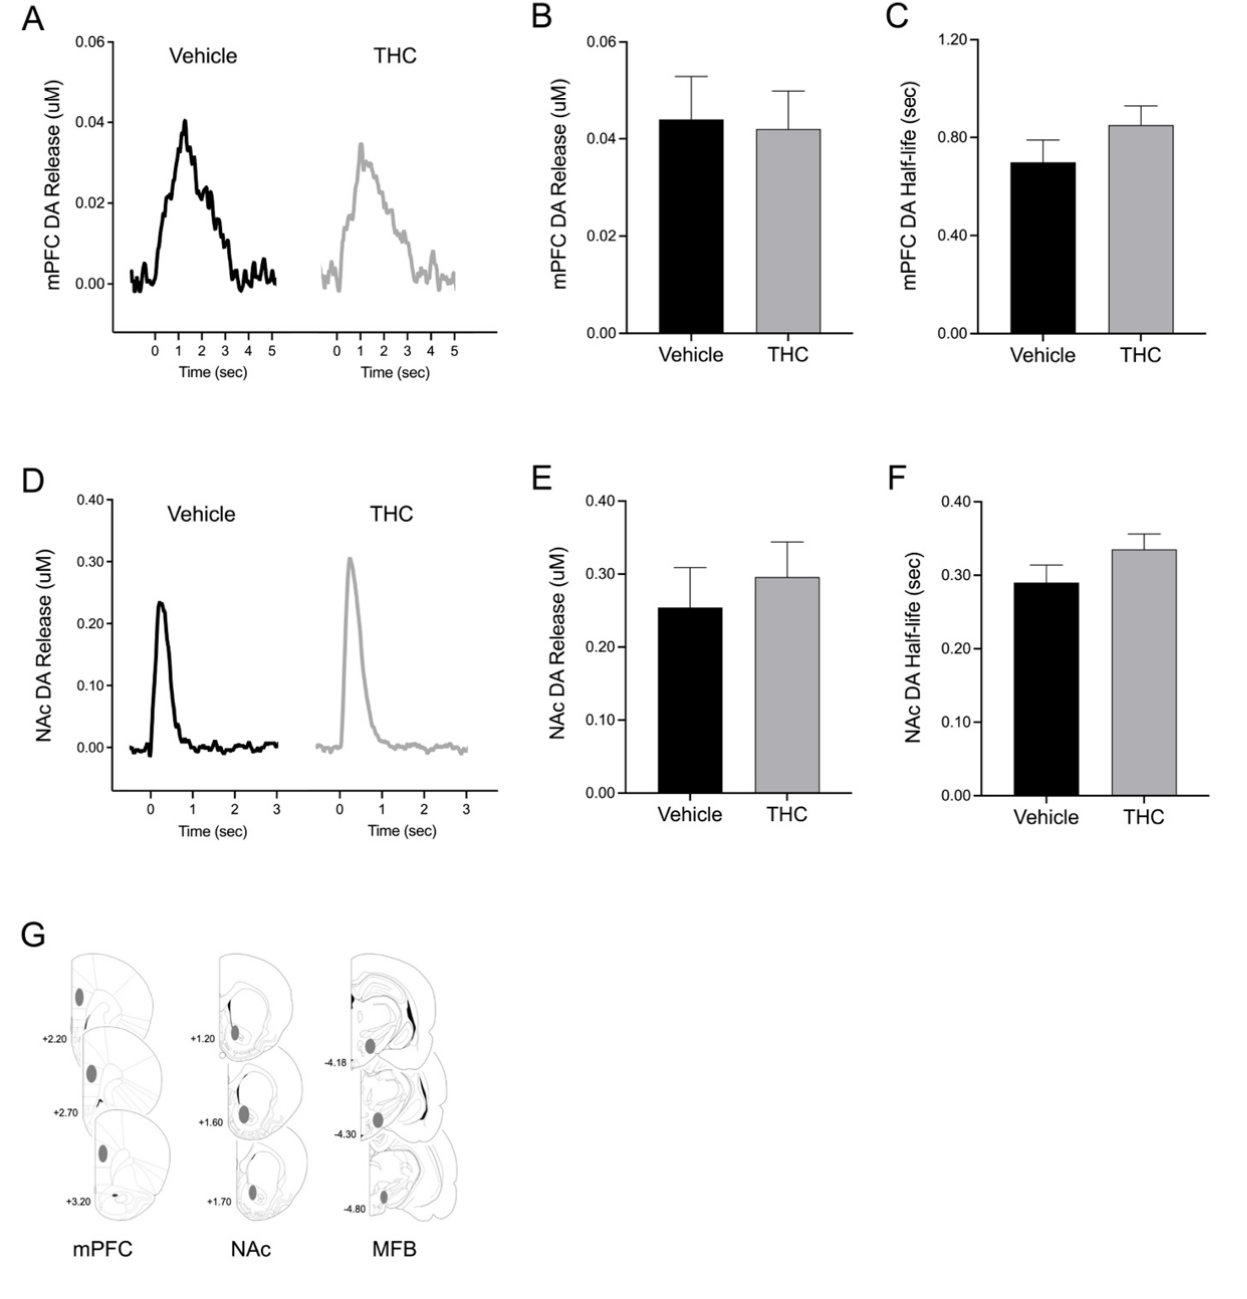
*

**Supp. Fig. 1** Perinatal Δ9-THC exposure did not affect baseline stimulation-evoked DA release (A, B) or half-life (C) in the mPFC. In the NAc, stimulation-evoked DA release (D, E) and half-life (F) were also not affected by perinatal Δ9-THC exposure. Histology figure (G) showing location of stimulating electrode placed in the MFB and recording electrodes in the mPFC and NAc. Error bars represent standard error of the mean. DA = dopamine, mPFC=medial prefrontal cortex, NAc=nucleus accumbens, MFB=medial forebrain bundle, THC= delta-9-tetrahydrocannabinol

*
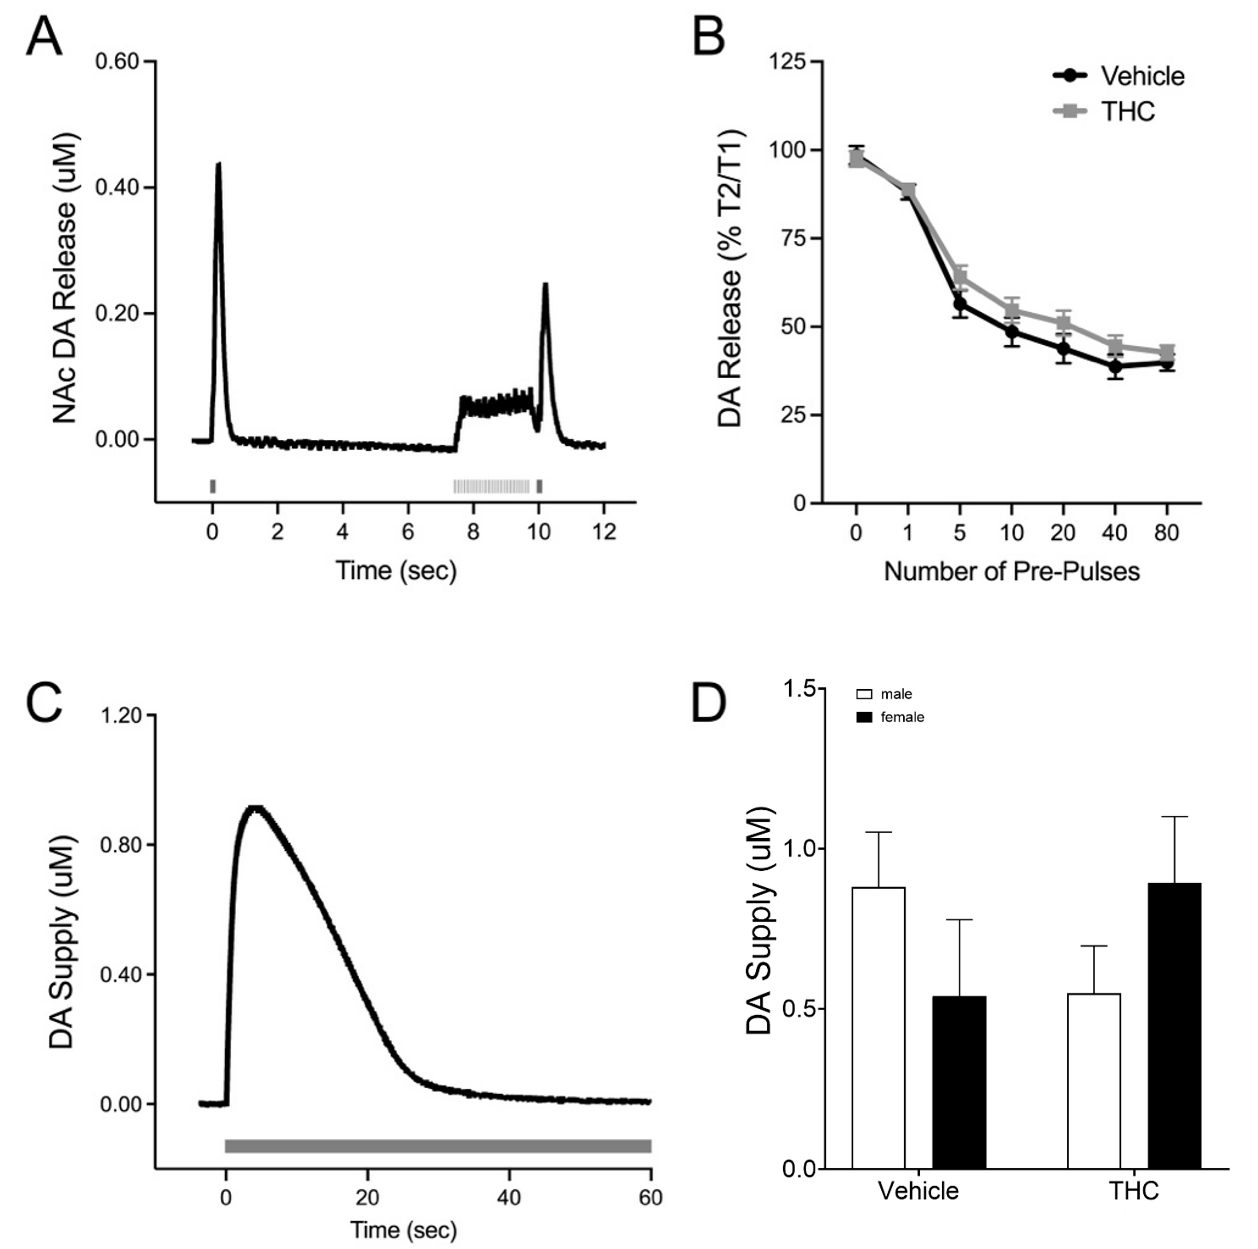
*

**Supp. Fig. 2** Perinatal THC exposure did not affect autoreceptor sensitivity (A, B). While the effect of exposure on DA supply (C) appeared to differ based on sex (D), post hoc simple effects analysis did not reveal an effect of exposure in either sex analyzed separately, or an effect of sex in the rats perinatally exposed to vehicle or to THC. Error bars represent standard error of the mean. DA = dopamine, NAc=nucleus accumbens, THC= delta-9-tetrahydrocannabinol
